# Supplementary material for: Modulation of charge carrier mobility by side-chain engineering of bi(thienylenevinylene)thiophene containing PPE–PPVs
Source: Royal Society of Chemistry journal article supplement (doi:10.1039/c6ra00858e), 2016-01-01
Supplement: c6ra00858e1.pdf [file c6ra00858e1.pdf]

## Supporting Information

### Modulation of Charge Carrier Mobility by Side-Chain Engineering of Bi(thienylenevinylene)thiophene Containing PPE-PPVs

Rupali R. Jadhav,<sup>ab</sup> Nadia Camaioni,<sup>\*c</sup> Kerstin Oppelt,<sup>d</sup> Francesca Tinti,<sup>c</sup> Massimo Gazzano,<sup>c</sup> Valeria Fattori,<sup>c</sup> Prakash P. Wadgaonkar,<sup>b</sup> Silke Rathgeber,<sup>e</sup> Harald Hoppe<sup>fg</sup> and Daniel A. M. Egbe<sup>\*a</sup>

<sup>a</sup>Linz Institute for Organic Solar Cells, Johannes Kepler University Linz, Altenbergerstr. 69, 4040 Linz, Austria. E-mail: [daniel\\_ayuk\\_mbi.egbe@jku.at](mailto:daniel_ayuk_mbi.egbe@jku.at)

<sup>b</sup>Polymers & Advanced Materials Laboratory, Polymer Science and Engineering Division, CSIR-National Chemical Laboratory, Dr. Homi Bhabha Road, Pune 411008, Maharashtra, India

<sup>c</sup>Istituto per la Sintesi Organica e la Fotoreattività, Consiglio Nazionale delle Ricerche, via P. Gobetti 101, I-40129 Bologna, Italy. E-mail: [nadia.camaioni@isof.cnr.it](mailto:nadia.camaioni@isof.cnr.it)

<sup>d</sup>Institute of Inorganic Chemistry, Johannes Kepler University Linz, Altenbergerstr. 69, 4040 Linz, Austria

<sup>e</sup>Institute for Integrated Natural Sciences, University of Koblenz-Landau, Universitätsstr.1, 56070 Koblenz, Germany

<sup>f</sup>Institute of Physics, Ilmenau University of Technology, Weimarer-Str. 32, 98693 Ilmenau, Germany

<sup>g</sup>Institute of Organic Chemistry and Macromolecular Chemistry, Friedrich Schiller University, Humboldtstr. 10, 07743, Jena, Germany

\*Correspondence should be addressed to: [nadia.camaioni@isof.cnr.it](mailto:nadia.camaioni@isof.cnr.it); [daniel\\_ayuk\\_mbi.egbe@jku.at](mailto:daniel_ayuk_mbi.egbe@jku.at)

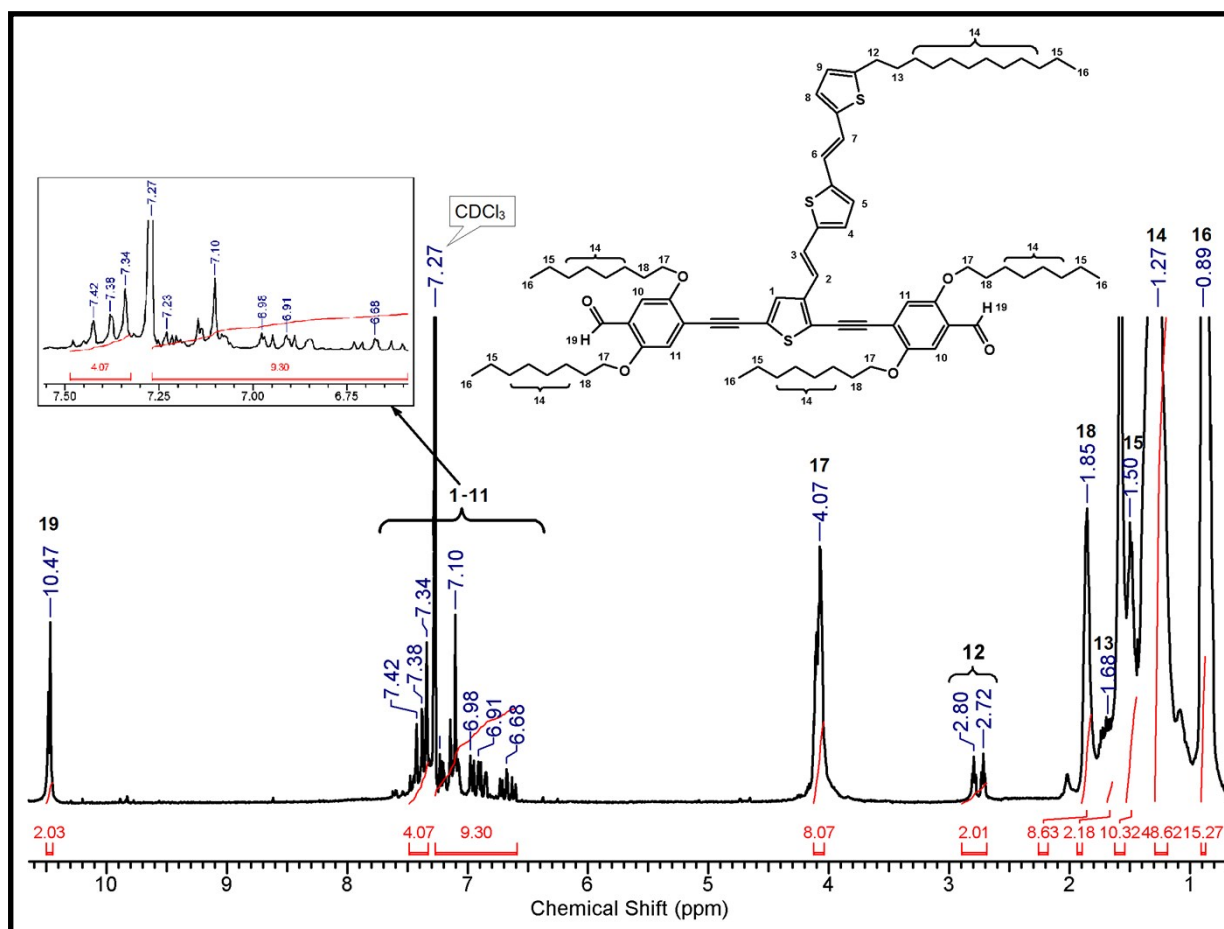

**Figure S1.** <sup>1</sup>H-NMR (CDCl<sub>3</sub>, 500 MHz) spectrum of dialdehyde **3a**. Inset shows expanded aromatic region.

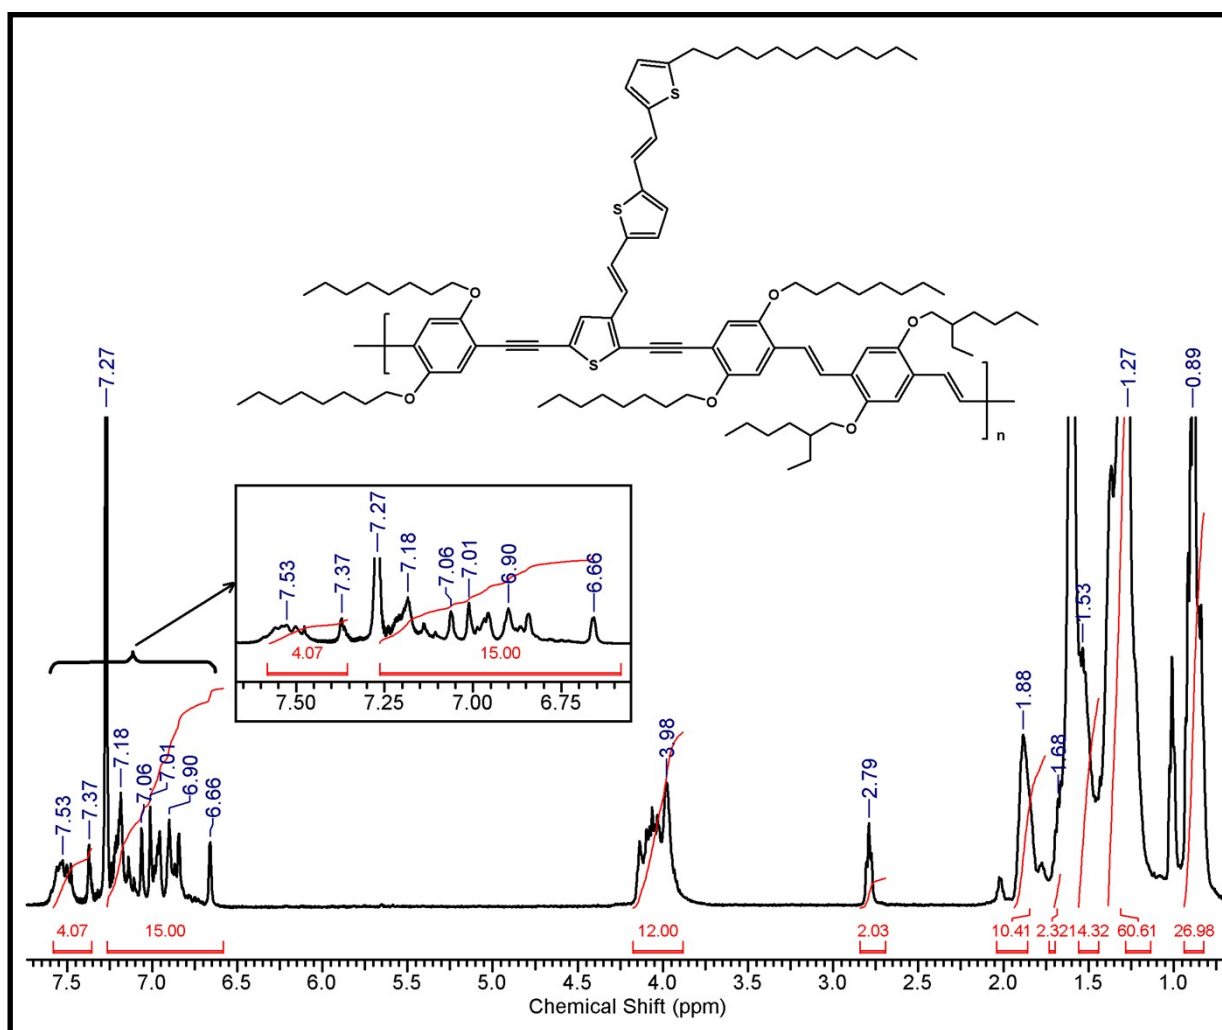

**Figure S2.** <sup>1</sup>H-NMR (CDCl<sub>3</sub>, 500 MHz) spectrum of polymer **BTE-PVab**. Inset shows expanded aromatic region.

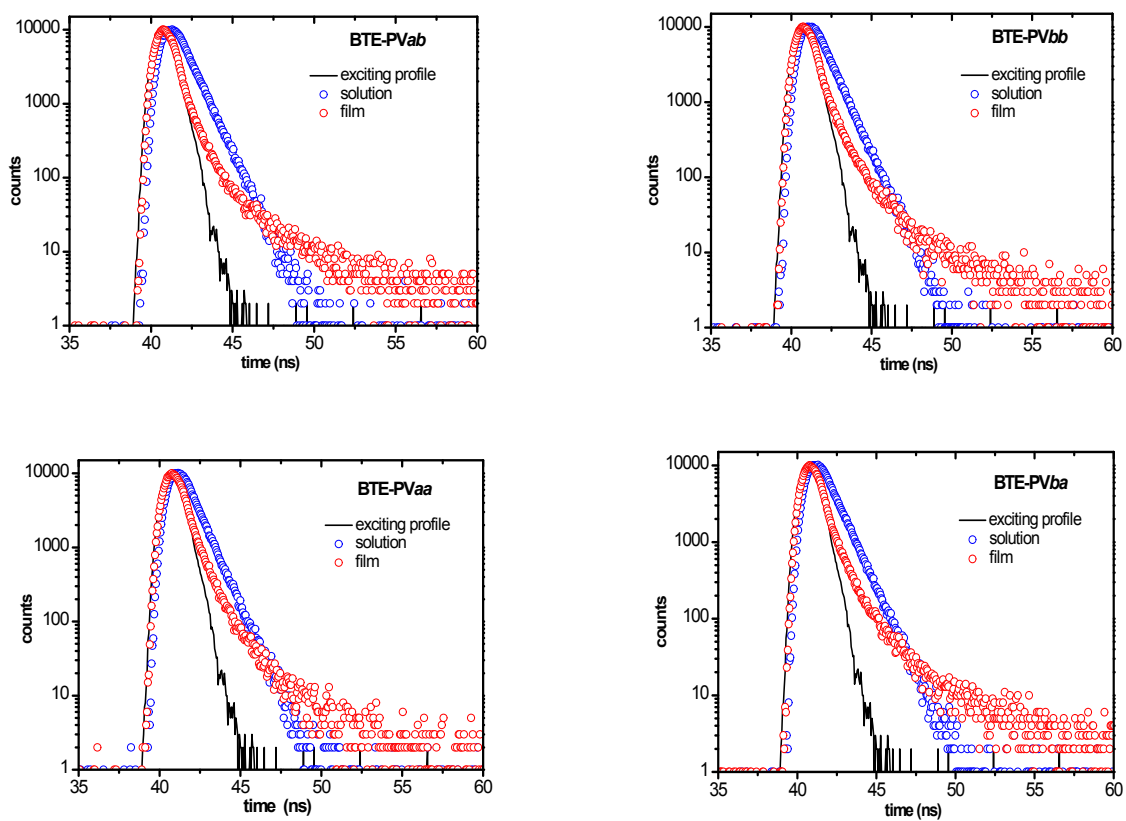

**Figure S3.** Luminescence decay curves in dilute chloroform solution and thin film.

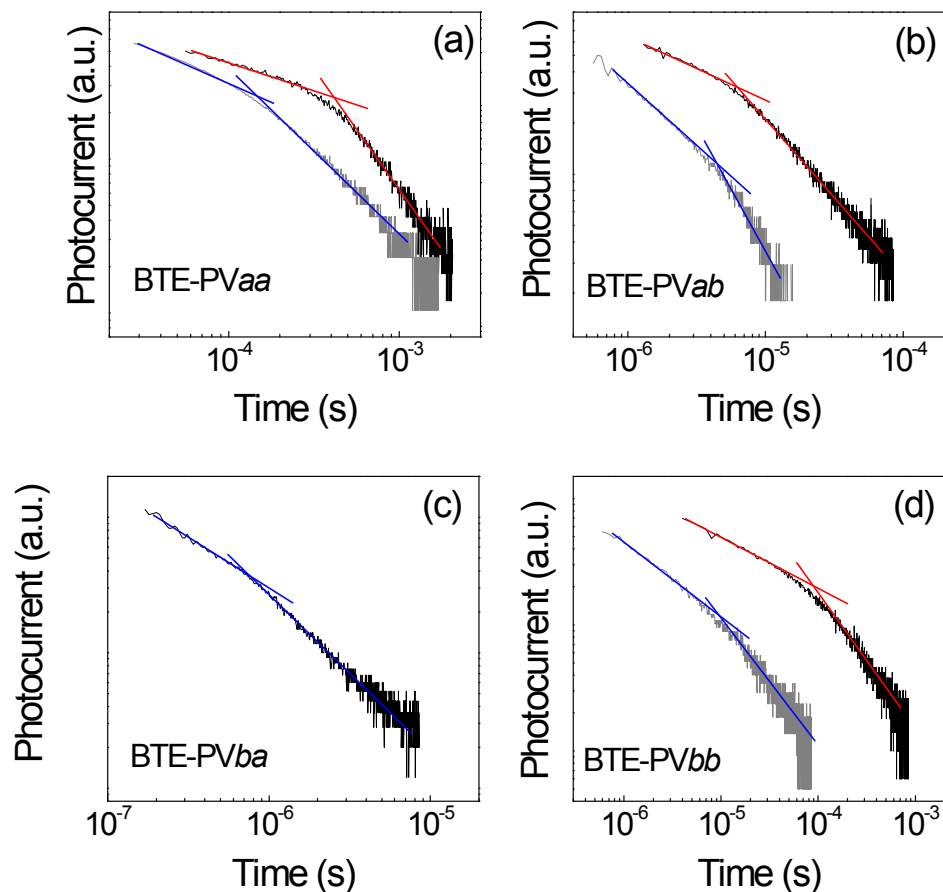

**Figure S4.** Typical TOF signals for positive (black lines) and negative charge carriers (gray lines) in log-log scales: **BTE-PVaa** (a); **BTE-PVab** (b); **BTE-PVba\*** (c); **BTE-PVbb** (d). Applied electric field of about  $8 \times 10^4$  V cm<sup>-1</sup>. Red and blue lines illustrate the method for determining the transit time of charge carriers, that is at the intersection of the asymptotes to the two portions with different slopes of the photocurrent signals.

\* The photocurrent signal for negative carriers was not detected, presumably because of very short transit times of electrons for this polymer.
